# Supplementary material for: Three isolated structural motifs in one crystal: penetration of two 1D chains through large cavities within 2D polymeric sheets
Source: Royal Society of Chemistry journal article supplement (doi:10.1039/b922698m), 2009-12-17
Supplement: b922698m.pdf [file b922698m.pdf]

## Supporting information:

### Three isolated structural motifs in one crystal: Penetration of two 1D chains through large cavities within 2D polymeric sheets

Muhammad Arif Nadeem,<sup>a</sup> Mohan Bhadbhade,<sup>b</sup> Roland Bircher<sup>c</sup> and John Arron Stride\*<sup>a,c</sup>

<sup>a</sup> School of Chemistry, University of New South Wales, Sydney, NSW 2052, Australia. Fax: +61 (02) 9385 6141; Tel: +61 (0)2 9385 4672; E-mail: j.stride@unsw.edu.au

<sup>b</sup> Analytical Centre, University of New South Wales, Sydney, NSW 2052, Australia.

<sup>c</sup> Bragg Institute, Australian Nuclear Science and Technology Organisation, PMB 1, Menai, NSW 2234, Australia.

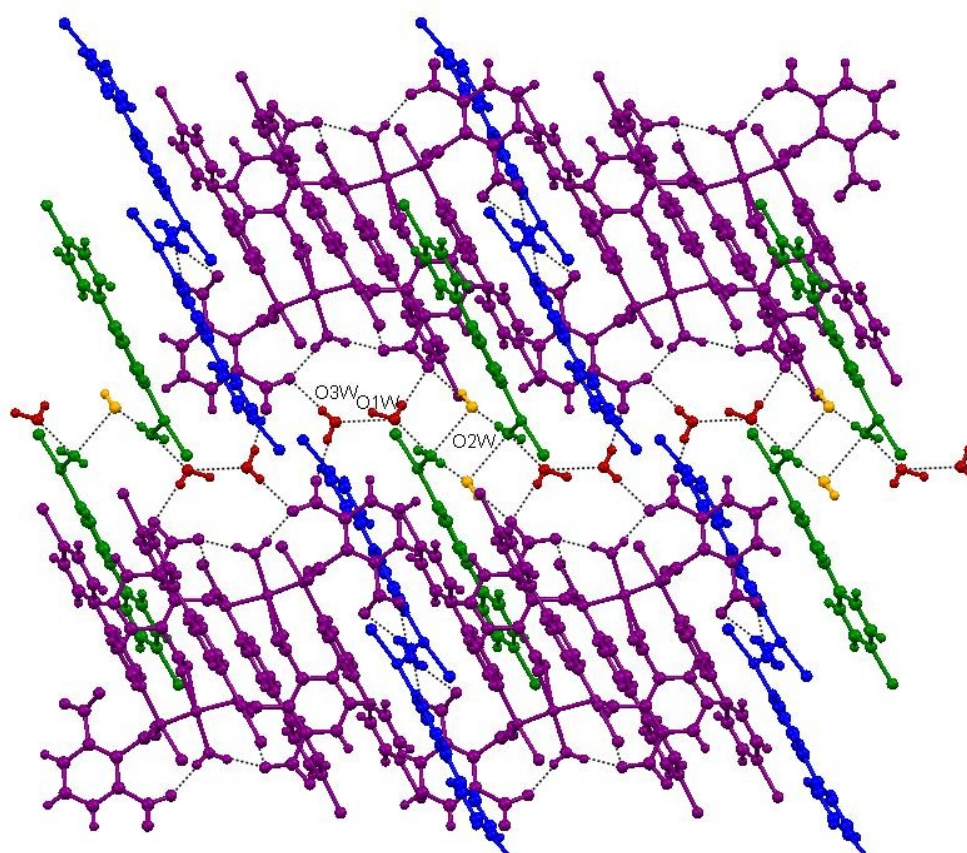

Figure S1: Detail of hydrogen-bonding between the 2D layers, generating the pseudo-3D structure. Polymer A (2D) shown in purple and the two 1D polymers, **B** and **C**, in green and blue respectively. Lattice water molecules are shown in red, whilst hydroxide ions ( $\text{OH}^-$ ) in yellow.

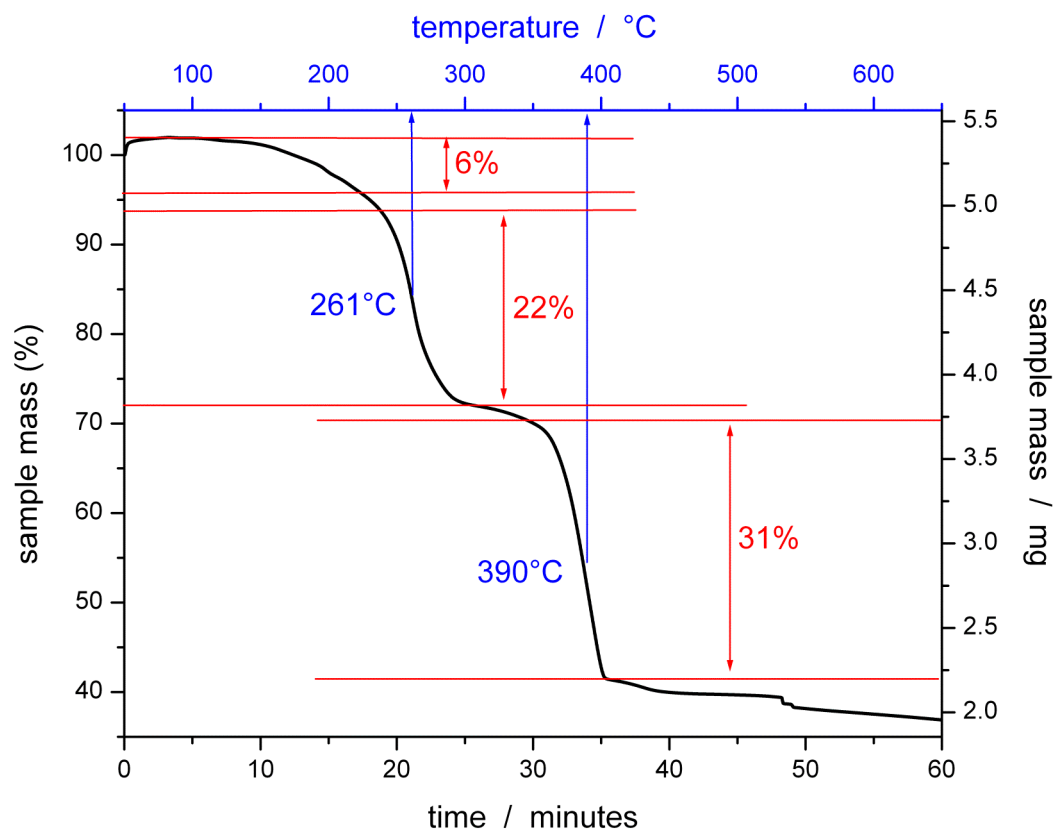

Figure S2: Thermogravimetric analysis of  $\text{Cu}_3(\text{Hbtc})(\text{btc})(\text{bpy})_2$ . Three distinct regions of mass loss were observed: (i) 6% over the temperature range of 150 - 220°C corresponding to the loss of water molecules (both coordinated and non-coordinated), *theoretical*: 9.8%; (ii) 22% around 261°C corresponding to the loss of the organic components of the 1D polymers **B** and **C**, *theoretical*: 21.3%; and (iii) 31% at 390°C corresponding to sample degradation. There is an additional small mass loss around 530°C. All samples were run under a flow of nitrogen at a heating rate of 10°C/min.
